# Supplementary material
Source: PubMed Central journal article supplement (PMC9764968)
Supplement: NIHMS1854013-supplement-Sup_1.pdf [file NIHMS1854013-supplement-Sup_1.pdf]

Materials List for

# Isolation of Cardiac and Vascular Smooth Muscle Cells from Adult, Juvenile, Larval and Embryonic Zebrafish for Electrophysiological Studies

Soma S. Singareddy<sup>1</sup>, Conor McClenaghan<sup>1</sup>, Helen I. Roessler<sup>2</sup>, Robert Tryon<sup>1</sup>, Colin G. Nichols<sup>1</sup>

<sup>1</sup>Department of Cell Biology and Physiology and Center for the Investigation of Membrane Excitability Diseases, Washington University in St. Louis

<sup>2</sup>Department of Genetics, Center for Molecular Medicine, University Medical Center Utrecht, Utrecht University

## Corresponding Author

Colin G. Nichols  
cnichols@wustl.edu

## Citation

Singareddy, S.S., McClenaghan, C., Roessler, H.I., Tryon, R., Nichols, C.G. Isolation of Cardiac and Vascular Smooth Muscle Cells from Adult, Juvenile, Larval and Embryonic Zebrafish for Electrophysiological Studies. *J. Vis. Exp.* (), e63225, doi:10.3791/63225 (2022).

## Date Published

February 9, 2022

## DOI

10.3791/63225

## URL

jove.com/video/63225

## Materials

| Name                                                | Company           | Catalog Number | Comments                                                                     |
|-----------------------------------------------------|-------------------|----------------|------------------------------------------------------------------------------|
| 1.5 mL Centrifuge Tubes                             | Eppendorf         | 22364111       |                                                                              |
| 10 mL Syringe                                       | Fisher Scientific | 14-955-459     |                                                                              |
| 19 Gauge Needle                                     | BD                | 305187         |                                                                              |
| 2,3-Butanedione Monoxime (BDM)                      | Sigma-Aldrich     | B0753          |                                                                              |
| 5 mL Centrifuge Tubes                               | Sigma-Aldrich     | EP0030119479   | For embryonic heart isolation                                                |
| Axopatch 200B amplifier and Digidata 1200 digitizer | Molecular Devices |                | Used for action potential recordings                                         |
| Benchtop Mini Centrifuge                            | Southern Labware  | MLX-106        |                                                                              |
| Blebbistatin                                        | Sigma-Aldrich     | 203390         |                                                                              |
| Bovine Serum Albumin (BSA)                          | Sigma-Aldrich     | A9418          |                                                                              |
| Calcium Chloride                                    | Sigma-Aldrich     | C4901          |                                                                              |
| Cell-Strainer Sieve                                 | Cole-Parmer       | EW-06336-71    | 100 µm sieve for embryonic heart isolation                                   |
| Collagenase Type H                                  | Sigma-Aldrich     | C8051          |                                                                              |
| Collagenase Type II                                 | Worthington       | LS004176       |                                                                              |
| Collagenase Type IV                                 | Worthington       | LS004188       |                                                                              |
| Curved Forceps                                      | Fisher Scientific | 16-100-110     |                                                                              |
| DTT                                                 | Sigma-Aldrich     | D0632          |                                                                              |
| EGTA                                                | Sigma-Aldrich     | 324626         |                                                                              |
| Elastase                                            | Worthington       | LS003118       |                                                                              |
| Fetal Bovine Serum (FBS)                            | Sigma-Aldrich     | F2442          |                                                                              |
| Fine Forceps                                        | Dumont            | Style #5       | Ceramic-coated forceps for adult and juvenile CV tissue isolation (Need two) |
| Glucose                                             | Sigma-Aldrich     | G8270          |                                                                              |

|                                   |                         |           |                                               |
|-----------------------------------|-------------------------|-----------|-----------------------------------------------|
| HEPES                             | Sigma-Aldrich           | H3375     |                                               |
| Insulin                           | Sigma-Aldrich           | I2643     |                                               |
| K2ATP                             | Sigma-Aldrich           | A8937     |                                               |
| Large Petri Dish                  | Sigma-Aldrich           | P5981     | For dissociation                              |
| Magnesium Chloride                | Sigma-Aldrich           | M8266     |                                               |
| Micro-Hematocrit Capillary Tubes  | Kimble Chase            | 41A2502   | Soda lime glass for patch pipettes            |
| Papain                            | Worthington             | LS003118  |                                               |
| Pasteur Pipettes                  | Fisher Scientific       | 13-678-6A |                                               |
| Petri Dish                        | Sigma-Aldrich           | P5606     | 100 mm x 20 mm, for embryonic heart isolation |
| Phosphate-Buffered Saline (PBS)   | Sigma-Aldrich           | 806552    |                                               |
| Potassium Chloride                | Sigma-Aldrich           | P3911     |                                               |
| Scissors                          | Fine Science Tools      | 14090-09  | For adult and juvenile zebrafish decapitation |
| Sodium Chloride                   | Sigma-Aldrich           | S9888     |                                               |
| Sodium Hydroxide                  | Sigma-Aldrich           | S8045     |                                               |
| Super Fine Forceps                | Dumont                  | Style #SF | For isolating larval CV tissues (Need two)    |
| Taurine                           | Sigma-Aldrich           | T0625     |                                               |
| Thermoshaker                      | ThermoFisher Scientific | 13687711  |                                               |
| Tricaine Methanesulfonate (MS222) |                         |           | For anaesthetizing zebrafish larvae           |
| Trypsin Inhibitor                 | Sigma-Aldrich           | T6522     |                                               |
